# Supplementary material
Source: Springer Nature journal article supplement (https://www.springermedizin.de/resource/supplementary/12913_2012_2091_MOESM1_ESM.pdf/9529792)
Supplement: MOESM1 [file 9529792]

**2332 records**  
100 from Web of Knowledge  
58 from Science Direct  
605 from BioMed Central  
149 from Medline  
5 from Pubmed  
1411 from Social Services Abstracts  
4 from Sociological Abstracts

**12 records**  
4 from selected websites  
8 from hand-searched references

**1831 records** after duplicates are removed

Articles screened on the basis of **title & abstract**

**81 full-text articles**

**1750 papers excluded**  
544 Emphasis not on HIV/AIDS  
614 not in Resource-limited setting  
443 No community component  
149 Majority non-adult population

**Full text articles** assessed for eligibility

**30 studies** included

**51 papers excluded**  
3 duplicate data  
2 non-English  
5 majority non-HAART  
4 majority second-line  
31 no explicit community support component  
6 majority not resource-limited setting
